# Supplementary material
Source: ML conference proceedings conference paper supplement (https://proceedings.mlr.press/v139/mehrabi21a.html)
Supplement: Supplementary file [file mehrabi21a-supp.pdf]

## A. Proof of theorems and technical lemmas

### A.1. Proof of Proposition 3.2

From the definition of robust surrogate in (9) for the setting of Proposition 3.2 we have

$$\phi_\gamma(\theta; z_0) := \sup_x \left\{ (y_0 - x^\top \theta)^2 - \gamma \|x - x_0\|_{\ell_2}^2 \right\},$$

by introducing  $g_\gamma(x) := (y_0 - x^\top \theta)^2 - \gamma \|x - x_0\|_{\ell_2}^2$ , for every scalar  $c$  we get

$$\begin{aligned} g_\gamma(x_0 + c\theta) &= g_\gamma(x_0) + 2c(x_0^\top \theta - y_0) \|\theta\|_{\ell_2}^2 \\ &\quad + c^2 \|\theta\|_{\ell_2}^2 (\|\theta\|_{\ell_2}^2 - \gamma), \end{aligned}$$

this implies if  $\gamma < \|\theta\|_{\ell_2}^2$ , then  $\phi_\gamma(\theta; z_0) = +\infty$ . Consider  $\gamma \geq \|\theta\|_{\ell_2}^2$ , then from relation  $\nabla^2 g_\gamma(x) = 2(\theta\theta^\top - \gamma I)$  we realize that  $g_\gamma$  is concave. Writing the first order optimal condition we have

$$(y_0 - x^\top \theta)\theta + \gamma(x - x_0) = 0. \quad (34)$$

Multiplying by  $\theta$  and solving for  $x^\top \theta$ , we get

$$x^\top \theta = \frac{\gamma x_0^\top \theta - y_0 \|\theta\|^2}{\gamma - \|\theta\|^2}.$$

Substituting for  $x^\top \theta$  in the stationary condition (34) implies

$$x^* = x_0 + \frac{x_0^\top \theta - y_0}{\gamma - \|\theta\|_{\ell_2}^2} \theta.$$

Replacing  $x^*$  in  $g_\gamma$  yields

$$\phi_\gamma(\theta; z) = \begin{cases} +\infty & \text{if } \gamma < \|\theta\|_{\ell_2}^2, \\ \frac{\gamma(y_0 - x^\top \theta)^2}{(\gamma - \|\theta\|_{\ell_2}^2)} & \text{if } \gamma \geq \|\theta\|_{\ell_2}^2. \end{cases} \quad (35)$$

Then, we use dual formulation (8) to compute the Wasserstein adversarial risk:

$$\begin{aligned} \text{AR}(\theta) &:= \sup_{\mathbb{Q} \in \mathcal{U}_\varepsilon(\mathbb{P}_Z)} \mathbb{E}_{z \sim \mathbb{Q}} [\ell(\theta; z)] \\ &= \inf_{\gamma \geq 0} \{ \gamma \varepsilon^2 + \mathbb{E}_{\mathbb{P}_Z} [\phi_\gamma(\theta; z)] \} \\ &= \inf_{\gamma \geq \|\theta\|_{\ell_2}^2} \{ \gamma \varepsilon^2 + \mathbb{E}_{\mathbb{P}_Z} [\phi_\gamma(\theta; z)] \} \\ &= \inf_{\gamma \geq \|\theta\|_{\ell_2}^2} \left\{ \gamma \varepsilon^2 + \frac{\gamma \mathbb{E}_{\mathbb{P}_Z} [\ell(\theta; z)]}{\gamma - \|\theta\|_{\ell_2}^2} \right\}, \end{aligned}$$

the infimum is achieved at

$$\gamma^* = \frac{1}{\varepsilon} \sqrt{\mathbb{E}_{\mathbb{P}_Z} [\ell(\theta; z)]} \|\theta\|_{\ell_2} + \|\theta\|_{\ell_2}^2.$$

Finally, this gives us

$$\text{AR}(\theta) = \left( \sqrt{\mathbb{E}_{\mathbb{P}_Z} [\ell(\theta; z)]} + \varepsilon \|\theta\|_{\ell_2} \right)^2.$$

### A.2. Proof of Theorem 3.3

Define  $\mathcal{R}(\theta) := \lambda \text{SR}(\theta) + \text{AR}(\theta)$ . Proposition 3.2 implies  $\text{AR}(\theta) = \text{SR}(\theta) + 2\varepsilon \|\theta\|_{\ell_2} \sqrt{\text{SR}(\theta)} + \varepsilon^2 \|\theta\|_{\ell_2}^2$ , then by expanding adversarial risk relation  $\text{AR}(\theta)$  in  $\mathcal{R}(\theta)$  we get

$$\mathcal{R}(\theta) = (1 + \lambda) \text{SR}(\theta) + \varepsilon^2 \|\theta\|_{\ell_2}^2 + 2\varepsilon \|\theta\|_{\ell_2} \sqrt{\text{SR}(\theta)}. \quad (36)$$

It is easy to see  $\text{SR}(\theta) = \sigma_y^2 + \theta^\top \Sigma \theta - 2v^\top \theta$ . Replace  $\nabla_\theta \text{SR}(\theta) = 2(\Sigma \theta - v)$  in (36) to get

$$\begin{aligned} \nabla_\theta \mathcal{R}(\theta) &= 2(1 + \lambda)(\Sigma \theta - v) + 2\varepsilon^2 \theta \\ &\quad + 2\varepsilon \left( \frac{\theta}{\|\theta\|_{\ell_2}} \sqrt{\text{SR}(\theta)} + (\Sigma \theta - v) \frac{\|\theta\|_{\ell_2}}{\sqrt{\text{SR}(\theta)}} \right), \end{aligned} \quad (37)$$

therefore stationary points (solutions of  $\nabla_\theta \mathcal{R}(\theta) = 0$ ) and a critical point  $\theta = 0$  are candidates for global minimizers. From equation  $\text{SR}(\theta) = \sigma_y^2 + \theta^\top \Sigma \theta - 2v^\top \theta$  and adversarial risk relation in Proposition 3.2 it is clear that for  $\theta = 0$  we have  $\text{SR}(\theta) = \text{AR}(\theta) = \sigma_y^2$ . Next, we focus on characterizing stationary minimizers of  $\mathcal{R}(\theta)$  and their corresponding standard and adversarial risk values. If  $\theta_*$  is a stationary point, then putting (37) to be zero yields

$$\begin{aligned} &\left( \left( 1 + \lambda + \frac{\varepsilon \|\theta_*\|_{\ell_2}}{\sqrt{\text{SR}(\theta_*)}} \right) \Sigma + \left( \varepsilon^2 + \frac{\varepsilon \sqrt{\text{SR}(\theta_*)}}{\|\theta_*\|_{\ell_2}} \right) I \right) \theta_* \\ &= \left( 1 + \lambda + \frac{\varepsilon \|\theta_*\|_{\ell_2}}{\sqrt{\text{SR}(\theta_*)}} \right) v. \end{aligned} \quad (38)$$

Introduce  $A_* := \frac{\sqrt{\text{SR}(\theta_*)}}{\|\theta_*\|_{\ell_2}}$  and  $\gamma_* := \frac{\varepsilon^2 + \varepsilon A_*}{1 + \lambda + \frac{\varepsilon}{A_*}}$ , then (38) can be simplified to  $\theta_* = (\Sigma + \gamma_* I)^{-1} v$ . By replacing  $\theta_* = (\Sigma + \gamma_* I)^{-1} v$  in  $A_*$  along with equation  $\text{SR}(\theta) = \sigma_y^2 + \theta^\top \Sigma \theta - 2v^\top \theta$  we get

$$\begin{aligned} A_* &= \frac{\sqrt{\text{SR}((\Sigma + \gamma_* I)^{-1} v)}}{\|(\Sigma + \gamma_* I)^{-1} v\|_{\ell_2}} \\ &= \frac{1}{\|(\Sigma + \gamma_* I)^{-1} v\|_{\ell_2}} \left( \sigma_y^2 + \left\| \Sigma^{1/2} (\Sigma + \gamma_* I)^{-1} v \right\|_{\ell_2}^2 - 2v^\top (\Sigma + \gamma_* I)^{-1} v \right)^{1/2}, \end{aligned}$$

therefore  $\gamma_*$  is a fixed point solution of two equations (15) and (16). Moreover, definition of  $A_*$  gives us  $\text{SR}(\theta_*) = A_*^2 \|(\Sigma + \gamma_* I)^{-1} v\|_{\ell_2}^2$ . Next, from adversarial risk relation in Proposition A.1 we know that  $\text{AR}(\theta_*) = (\sqrt{\text{SR}(\theta_*)} + \varepsilon \|\theta_*\|_{\ell_2})^2$ . This implies  $\text{AR}(\theta_*) = (A_* + \varepsilon)^2 \|(\Sigma + \gamma_* I)^{-1} v\|_{\ell_2}^2$ .

### A.3. Proof of Corollary 3.4

For linear data model  $y = x^\top \theta_0 + w$  with isotropic features  $\mathbb{E}[xx^\top] = I_d$  and Gaussian noise  $w \sim \mathcal{N}(0, \sigma^2)$  we have  $\mathbb{E}[xy] = \theta_0$ . In addition, we have  $\mathbb{E}[y^2] = \sigma^2 + \|\theta_0\|_{\ell_2}^2$ . This gives us  $\sigma_y^2 = \sigma^2 + \|\theta_0\|_{\ell_2}^2$ . Use Theorem 3.3 with  $v = \theta_0$ ,  $\Sigma = I$ , and  $\sigma_y^2 = \sigma^2 + \|\theta_0\|_{\ell_2}^2$  to get Corollary 3.4.

### A.4. Proof of Proposition 3.5

We start by proving the expression for standard risk. By definition we have

$$\begin{aligned} \text{SR}(\theta) &:= \mathbb{E}[\mathbb{I}(y \neq \hat{y})] = \mathbb{P}(yx^\top \theta \leq 0) \\ &= \mathbb{P}\left(y(y\mu + \Sigma^{1/2}u)^\top \theta \leq 0\right) \\ &= \mathbb{P}\left((\mu + \Sigma^{1/2}u)^\top \theta \leq 0\right) \\ &= \mathbb{P}\left(\mu^\top \theta + \left\|\Sigma^{1/2}\theta\right\|_{\ell_2} \nu \leq 0\right) \\ &= \Phi\left(-\frac{\mu^\top \theta}{\left\|\Sigma^{1/2}\theta\right\|_{\ell_2}}\right), \end{aligned} \quad (39)$$

with  $u \sim \mathcal{N}(0, I_d)$  and  $\nu \sim \mathcal{N}(0, 1)$ . To prove the expression for adversarial risk we use the dual form (8). Our next lemma characterizes the function  $\phi_\gamma$  given by (9) for the binary problem under the Gaussian mixture model.

**Lemma A.1.** *Consider the binary classification problem under the Gaussian mixture model with 0-1 loss. Then, the robust surrogate for the loss function  $\phi_\gamma$  given by (9) with distance  $d(\cdot, \cdot)$  (12) satisfies*

$$\begin{aligned} \mathbb{E}_{\mathbb{P}_z}[\phi_\gamma(\theta; z)] &= \Phi\left(\sqrt{\frac{2}{b_\theta \gamma}} - a\right) \\ &+ \frac{b_\theta \gamma}{2} \left\{ \left(a_\theta + \sqrt{\frac{2}{b_\theta \gamma}}\right) \varphi\left(a_\theta - \sqrt{\frac{2}{b_\theta \gamma}}\right) \right. \\ &\quad \left. - a_\theta \varphi(a_\theta) + (a_\theta^2 + 1) \left[\Phi\left(a_\theta - \sqrt{\frac{2}{b_\theta \gamma}}\right) - \Phi(a_\theta)\right] \right\}, \end{aligned}$$

$$\text{with } a_\theta = \frac{\mu^\top \theta}{\left\|\Sigma^{1/2}\theta\right\|_{\ell_2}} \text{ and } b_\theta = \frac{\left\|\Sigma^{1/2}\theta\right\|_{\ell_2}^2}{\|\theta\|_{\ell_q}^2}.$$

*Proof (Lemma A.1).* By definition of the  $\phi_\gamma$  function, for the setting of Lemma A.1 we have

$$\phi_\gamma(\theta; z_0) = \sup_x \left\{ \mathbb{I}(y_0 x^\top \theta \leq 0) - \frac{\gamma}{2} \|x - x_0\|_{\ell_r}^2 \right\}.$$

We let  $v_0 := y_0 x_0$  and  $v = y_0 x$ . Given that  $y_0 \in \{\pm 1\}$ , the function  $\phi_\gamma$  can be written as

$$\phi_\gamma(\theta; z_0) = \sup_v \left\{ \mathbb{I}(v^\top \theta \leq 0) - \frac{\gamma}{2} \|v - v_0\|_{\ell_r}^2 \right\}.$$

First observe that by choosing  $x = x_0$ , we obtain  $\phi_\gamma(\theta; z_0) \geq 0$ . It is also clear that  $\phi_\gamma(\theta; z_0) \leq 1$ . We consider two cases.

**Case 1:** ( $v_0^\top \theta \leq 0$ ). By choosing  $v = v_0$  we obtain that  $\phi_\gamma(\theta; z_0) \geq 1$  and hence  $\phi_\gamma(\theta; z_0) = 1$ .

**Case 2:** ( $v_0^\top \theta > 0$ ). Let  $v_*$  be the maximizer in definition of  $\phi_\gamma(\theta; z_0)$ . If  $v_*^\top \theta > 0$ , then we have

$$\begin{aligned} \phi_\gamma(\theta; z_0) &= \mathbb{I}(v_*^\top \theta \leq 0) - \frac{\gamma}{2} \|v_* - v_0\|_{\ell_r}^2 \\ &= -\frac{\gamma}{2} \|v_* - v_0\|_{\ell_r}^2 \leq 0. \end{aligned}$$

Therefore,  $\phi_\gamma(\theta; z_0) = 0$  in this case. We next focus on the case that  $v_*^\top \theta \leq 0$ . It is easy to see that in this case,  $v_*$  is the solution of the following optimization:

$$\begin{aligned} \min_{v \in \mathbb{R}^d} \quad & \|v - v_0\|_{\ell_r} \\ \text{subject to} \quad & v^\top \theta \leq 0 \end{aligned} \quad (40)$$

Given that  $v_0^\top \theta > 0$  by assumption, using the Holder inequality it is straightforward to see that the optimal value is given by  $\|v - v_0\|_{\ell_r} = \frac{v_0^\top \theta}{\|\theta\|_{\ell_q}}$ , with  $\frac{1}{r} + \frac{1}{q} = 1$ .

The function  $\phi_\gamma$  is then given by  $\phi_\gamma(\theta; z_0) = 1 - \frac{\gamma}{2} \left(\frac{v_0^\top \theta}{\|\theta\|_{\ell_q}}\right)^2$ . Putting the two conditions  $v_*^\top \theta \leq 0$  and  $v_0^\top \theta > 0$  together, we obtain

$$\phi_\gamma(\theta; z_0) = \max \left\{ 1 - \frac{\gamma}{2} \left(\frac{v_0^\top \theta}{\|\theta\|_{\ell_q}}\right)^2, 0 \right\},$$

in this case.

Combining case 1 and case 2 we arrive at

$$\phi_\gamma(\theta; z_0) = \mathbb{I}(v_0^\top \theta \leq 0) \quad (41)$$

$$+ \max \left( 1 - \frac{\gamma}{2} \left(\frac{v_0^\top \theta}{\|\theta\|_{\ell_q}}\right)^2, 0 \right) \mathbb{I}(v_0^\top \theta > 0). \quad (42)$$

For  $(x_0, y_0)$  generated according to the Gaussian mixture model, we have  $v_0^\top \theta = y_0 x_0^\top \theta = \mu^\top \theta + \left\|\Sigma^{1/2}\theta\right\|_{\ell_2} \nu$  with  $\nu \sim \mathcal{N}(0, 1)$ . Hence,

$$\left| \frac{v_0^\top \theta}{\|\theta\|_{\ell_q}} \right| = \left| \frac{\mu^\top \theta}{\|\theta\|_{\ell_q}} + \frac{\left\|\Sigma^{1/2}\theta\right\|_{\ell_2} \nu}{\|\theta\|_{\ell_q}} \right|.$$

Letting  $a_\theta := \frac{\mu^\top \theta}{\|\Sigma^{1/2} \theta\|_{\ell_2}}$ , (41) can be written as

$$\begin{aligned} \phi_\gamma(\theta; z_0) &= \mathbb{I}(\nu \leq -a_\theta) \\ &+ \max\left(1 - \frac{\gamma}{2} \frac{\|\Sigma^{1/2} \theta\|_{\ell_2}^2}{\|\theta\|_{\ell_q}^2} (\nu + a_\theta)^2, 0\right) \cdot \mathbb{I}(\nu > -a_\theta) \\ &= \mathbb{I}(\nu \leq -a_\theta) \\ &+ \left(1 - \frac{b_\theta \gamma}{2} (\nu + a_\theta)^2\right) \mathbb{I}\left(\sqrt{\frac{2}{b_\theta \gamma}} - a_\theta > \nu > -a_\theta\right), \end{aligned} \quad (43)$$

where  $b_\theta := \frac{\|\Sigma^{1/2} \theta\|_{\ell_2}^2}{\|\theta\|_{\ell_q}^2}$ . By simple algebraic calculation, we get

$$\begin{aligned} \mathbb{E}_{\mathbb{P}_Z}[\phi_\gamma(\theta; z)] &= \Phi\left(\sqrt{\frac{2}{b_\theta \gamma}} - a_\theta\right) \\ &+ \frac{b_\theta \gamma}{2} \left\{ \left(a_\theta + \sqrt{\frac{2}{b_\theta \gamma}}\right) \varphi\left(a_\theta - \sqrt{\frac{2}{b_\theta \gamma}}\right) - a_\theta \varphi(a_\theta) \right. \\ &\quad \left. + (a_\theta^2 + 1) \left[\Phi\left(a_\theta - \sqrt{\frac{2}{b_\theta \gamma}}\right) - \Phi(a_\theta)\right] \right\}. \end{aligned}$$

□

The claim of Proposition 3.5 follows readily from Lemma A.1 and the fact that strong duality holds for the dual problem (8), where we use the change of variable  $\gamma \mapsto \frac{\gamma}{b_\theta}$ .

### A.5. Proof of Remark 3.7

Recall the objective (25) and define

$$\begin{aligned} \mathcal{R}(a) &:= \lambda \Phi(-a) + \gamma \varepsilon^2 + \Phi\left(\sqrt{\frac{2}{\gamma}} - a\right) \\ &+ \frac{\gamma}{2} \left\{ \left(a + \sqrt{\frac{2}{\gamma}}\right) \varphi\left(a - \sqrt{\frac{2}{\gamma}}\right) - a \varphi(a) \right. \\ &\quad \left. + (a^2 + 1) \left(\Phi\left(a - \sqrt{\frac{2}{\gamma}}\right) - \Phi(a)\right) \right\}. \end{aligned}$$

Then, we get

$$\begin{aligned} \frac{d\mathcal{R}(a)}{da} &= -\lambda \varphi(-a) \\ &+ \gamma \left\{ \varphi\left(\sqrt{\frac{2}{\gamma}} - a\right) - \varphi(a) \right. \\ &\quad \left. + a \left(\Phi\left(\sqrt{\frac{2}{\gamma}} - a\right) - \Phi(a)\right) \right\}. \end{aligned} \quad (44)$$

Note that

$$\begin{aligned} \frac{\partial}{\partial t} \left( \varphi(t-a) - \varphi(a) + a(\Phi(t-a) - \Phi(a)) \right) \\ = \varphi(t-a)(2a-t), \end{aligned} \quad (45)$$

and therefore the maximum of  $\varphi(t-a) - \varphi(a) + a(\Phi(t-a) - \Phi(a))$  is achieved at  $t = 2a$ . As a result  $\frac{d\mathcal{R}(a)}{da} \leq -\lambda \varphi(-a) < 0$ , which implies that the objective (25) is decreasing in  $a$ . Since  $|a| \leq \|\mu\|_{\ell_2}$ , its infimum is achieved at  $a = \|\mu\|_{\ell_2}$ .

Equations (26) follows from (24) by substituting for  $a_\theta = \|\mu\|_{\ell_2}$  and  $b_\theta = 1$ .

### A.6. Proof of Corollary 3.8

Recall the distance  $d(\cdot, \cdot)$  on the space  $\mathcal{Z} = \{z = (x, y), x \in \mathbb{R}^d, y \in \mathbb{R}\}$  given by  $d(z, \tilde{z}) = \|x - \tilde{x}\|_2 + \infty \cdot \mathbb{I}(y - \tilde{y})$ . This metric is induced from norm  $\|z\| = \|x\|_{\ell_2} + \infty \cdot \mathbb{I}(y = 0)$  with corresponding conjugate norm  $\|z\|_* = \|x\|_{\ell_2}$ . We will use Proposition 2.3 to find the variation of loss  $\ell$  and derive the first-order approximation for the Wasserstein adversarial risk. Denoting by  $u_j \in \mathbb{R}^d$  be the  $j$ th row of matrix  $U$ , for  $j = 1, 2, \dots, N$ , we have

$$\begin{aligned} \nabla_x \ell(\theta; Z) &= \nabla_x (y - \theta^\top \sigma(Ux))^2 \\ &= 2(\theta^\top \sigma(Ux) - y) \sum_{j=1}^N \theta_j \sigma'(u_j^\top x) u_j \\ &= 2(\theta^\top \sigma(Ux) - y) U^\top \text{diag}(\sigma'(Ux)) \theta. \end{aligned} \quad (46)$$

As we work with Wasserstein of order  $p = 2$ , we have conjugate order  $q = 2$ . Therefore, Proposition 2.3 gives us  $V_{P_Z, q}(\ell) = (\mathbb{E}[\|\nabla_z \ell(\theta; Z)\|_*^2])^{1/2}$ . By using (46) we get

$$V_{P_Z, q}(\ell) = 2 \left( \mathbb{E} \left[ (\theta^\top \sigma(Ux) - y)^2 \left\| U^\top \text{diag}(\sigma'(Ux)) \theta \right\|_{\ell_2}^2 \right] \right)^{1/2}.$$

Finally, relation  $\text{AR}(\theta) = \text{SR}(\theta) + \varepsilon V_{P_Z, q}(\ell) + O(\varepsilon^2)$  from Proposition 2.3 completes the proof. We just need to verify that the necessary condition in Proposition 2.3 holds for the loss  $\ell(\theta; z) = (y - \theta^\top \sigma(Wx))^2$ . By the setting of the problem, we have  $x \in \mathbb{S}^{d-1}(\sqrt{d})$  and  $u_j \in \mathbb{S}^{d-1}(1)$ . Therefore  $\|x\|_{\ell_2} \leq \sqrt{d}$  and  $\|U\|_{\text{op}} \leq \sqrt{\max(N, d)}$ .

In the following lemma we show that the solution  $\theta_\lambda$  to (14) is bounded as  $\lambda$  varies in  $[0, \infty)$ .

**Lemma A.2.** *Under the setting of Corollary 3.8, and for  $\theta_\lambda$  given by (14), there exist constants  $c_0$  and  $c_1$ , independent of  $\lambda$ , such that with probability at least  $1 - e^{-c_0 d}$  we have  $\|\theta_\lambda\|_{\ell_2} \leq c_1$ .*

Using Lemma A.2 we can restrict ourselves to the ball of  $\ell_2$  radius  $c_1$ . More specifically, we can define a ‘surrogate’ loss for (14) where  $\theta$  is constrained to be in ball of radius  $c_1$ , without changing its solution. We can then apply Proposition 2.3 to establish a relation between SR and AR. In the following part we show that the conditions of Proposition 2.3 are satisfied.

We adopt the shorthands  $D = \text{diag}(\sigma'(Ux))$ ,  $\tilde{D} =$

$\text{diag}(\sigma'(U\tilde{x}))$ ,  $s = \sigma(Ux)$ , and  $\tilde{s} = \sigma(U\tilde{x})$ , and write

$$\begin{aligned}
 & \frac{1}{2} \|\nabla_z \ell(\theta; z) - \nabla_z \ell(\theta; \tilde{z})\|_* \\
 &= \frac{1}{2} \|\nabla_x \ell(\theta; z) - \nabla_x \ell(\theta; \tilde{z})\|_{\ell_2} \\
 &\stackrel{(a)}{=} \left\| (\theta^\top s - y)U^\top D\theta - (\theta^\top \tilde{s} - \tilde{y})U^\top \tilde{D}\theta \right\|_{\ell_2} \\
 &\stackrel{(b)}{\leq} \left\| \theta^\top s U^\top (D - \tilde{D})\theta \right\|_{\ell_2} + \left\| \theta^\top (s - \tilde{s})U^\top \tilde{D}\theta \right\|_{\ell_2} \\
 &+ \left\| yU^\top (D - \tilde{D})\theta \right\|_{\ell_2} + \left\| (y - \tilde{y})U^\top \tilde{D}\theta \right\|_{\ell_2} \\
 &\stackrel{(c)}{\leq} Nc_1^2 + \sqrt{N}c_1^2 \|s - \tilde{s}\|_{\ell_2} + \sqrt{N}c_1^2 + \sqrt{N}c_1 \|y - \tilde{y}\| \\
 &\stackrel{(d)}{\leq} (N + \sqrt{N})c_1^2 + Nc_1^2 \|x - \tilde{x}\|_{\ell_2} + \sqrt{N}c_1 \|y - \tilde{y}\| \\
 &\leq (N + \sqrt{N})c_1^2 + Nc_1^2 (\|x - \tilde{x}\|_{\ell_2} + \infty \mathbb{I}_{\{y \neq \tilde{y}\}}) \\
 &\stackrel{(e)}{\leq} M + L\|z - \tilde{z}\|,
 \end{aligned}$$

where (a) comes from (46), in (b) we used triangle inequality, (c) is a direct result of Cauchy inequality and the fact that  $\sigma(u) \leq u$ , (d) comes from Lipschitz continuity of  $\sigma$ , and in (e) we used  $C = (N + \sqrt{N})c_1^2$  and  $L = Nc_1^2$ . Therefore the necessary condition in Proposition 2.3 is satisfied.

#### A.6.1. PROOF OF LEMMA A.2

By comparing the objective value (14) at  $\theta_\lambda$  and 0 and using the optimality of  $\theta_\lambda$  we get

$$\begin{aligned}
 & (1 + \lambda)\text{SR}(\theta_\lambda) \\
 & \leq (1 + \lambda)\text{SR}(\theta_\lambda) \\
 & \quad + 2\varepsilon \mathbb{E}_x \left[ [(f_d(x) - \theta_\lambda^\top \sigma(Ux))^2 + \sigma^2] \right. \\
 & \quad \left. \times \|U^\top \text{diag}(\sigma'(Ux))\theta_\lambda\|_{\ell_2}^2 \right]^{1/2} \\
 & \leq (1 + \lambda)\text{SR}(0).
 \end{aligned}$$

Therefore by invoking (31) we get

$$\mathbb{E}_x [(f_d(x) - \theta_\lambda^\top \sigma(Ux))^2] \leq \mathbb{E}_x [f_d(x)^2] \quad (47)$$

Using the inequality  $(a - b)^2 \geq \frac{a^2}{2} - b^2$ , we get

$$\mathbb{E}[(\theta_\lambda^\top \sigma(Ux))^2] \leq 4\mathbb{E}_x [f_d(x)^2] < c_2, \quad (48)$$

with probability at least  $1 - e^{-c_3 d}$  for some constants  $c_2, c_3 > 0$ . We next lower bound the eigenvalues of  $\mathbb{E}[\sigma(Ux)\sigma(Ux)^\top]$  from which we can upper bound  $\|\theta_\lambda\|_{\ell_2}$ .

Define the dual activation of  $\sigma$  as

$$\tilde{\sigma}(\rho) = \mathbb{E}_{(v,w) \sim \mathbb{N}_\rho} [\sigma(v)\sigma(w)]$$

where  $\mathbb{N}_\rho$  denotes the two dimensional Gaussian with mean zero and covariance  $\begin{pmatrix} 1 & \rho \\ \rho & 1 \end{pmatrix}$ . With this definition, we have

$\mathbb{E}[(\sigma(Ux)\sigma(Ux)^\top)_{ij}] = \tilde{\sigma}(u_i^\top u_j)$  for  $i, j = 1, \dots, N$ . Let  $\{a_r\}_{r=0}^\infty$  denote the Hermite coefficients defined by

$$a_r := \frac{1}{\sqrt{2\pi}} \int_{-\infty}^{\infty} \sigma(g)h_r(g)e^{-\frac{g^2}{2}} dg,$$

where  $h_r(g)$  is the normalized Hermite polynomial defined by

$$h_r(x) := \frac{1}{\sqrt{r!}} (-1)^r e^{\frac{x^2}{2}} \frac{d^r}{dx^r} e^{-\frac{x^2}{2}}.$$

Using the properties of normalized Hermite polynomials we have

$$\tilde{\sigma}(\rho) = \mathbb{E}_{(v,w) \sim \mathbb{N}_\rho} \left[ \left( \sum_{r=0}^{\infty} a_r h_r(v) \right) \left( \sum_{\tilde{r}=0}^{\infty} a_{\tilde{r}} h_{\tilde{r}}(w) \right) \right] = \sum_{r=0}^{\infty} a_r^2 \rho^r. \quad (49)$$

Writing in matrix form we obtain

$$\mathbb{E}[(\sigma(Ux)\sigma(Ux)^\top)] = \tilde{\sigma}(UU^\top) = \sum_{r=0}^{\infty} a_r^2 (UU^\top)^{\odot r}, \quad (50)$$

where for a matrix  $A^{\odot r} = A \odot (A^{\odot(r-1)})$  with  $\odot$  denoting the Hadamard product (entrywise product).

We next use the identity  $(AA^\top) \odot (BB^\top) = (A * B)(A * B)^\top$ , with  $*$  indicating the Khatri-Rao product. By using this identity and applying induction on  $r$  it is straightforward to get the following relation for any matrix  $A$ :

$$(AA^\top)^{\odot r} = (A^{*r})(A^{*r})^\top, \quad (51)$$

with  $A^{*r} = A * (A^{*(r-1)})$ . By using the above identity in Equation (50) we obtain

$$\begin{aligned}
 \mathbb{E}[(\sigma(Ux)\sigma(Ux)^\top)] &= \sum_{r=0}^{\infty} a_r^2 (UU^\top)^{\odot r} \\
 &= \sum_{r=0}^{\infty} (a_r U^{*r})(a_r U^{*r})^\top \\
 &\succeq a_r^2 (U^{*r})(U^{*r})^\top,
 \end{aligned}$$

for any  $r \geq 0$ . Using this bound with  $r = 2$  and the fact that  $a_2 = \frac{1}{2\sqrt{\pi}}$  for ReLU activation, we get

$$\mathbb{E}[(\sigma(Ux)\sigma(Ux)^\top)] \succeq \frac{1}{4\pi} (U * U) \geq c_4, \quad (52)$$

where the last step holds with probability at least  $1 - e^{-c_5 d}$  for some constants  $c_4$  and  $c_5$  using the result of (?)Corollary 7.5]soltanolkotabi2018theoretical.

Combining Equations (48) and (52) gives us  $\|\theta_\lambda\|_{\ell_2} \leq \sqrt{c_2/c_4}$ , which completes the proof.
